# Supplementary material for: Thiophene-based pyridine derivatives: synthesis, crystal structures, two-photon absorption properties and bio-imaging applications in the near-IR region
Source: Royal Society of Chemistry journal article supplement (doi:10.1039/c6nj00845c), 2016-01-01
Supplement: c6nj00845c1.pdf [file c6nj00845c1.pdf]

## New Journal of Chemistry

### Electronic Supplementary Information

#### Thiophene-based pyridine derivatives: Synthesis, crystal structures, two-photon absorption properties and bio-imaging application in Near-IR region

Shasha Xu,<sup>a‡</sup> Yingzhong Zhu,<sup>a‡</sup> Rui Li,<sup>a</sup> Jian Su,<sup>a</sup> Shengli Li,<sup>a</sup> Hongping Zhou,<sup>a</sup> Jieying Wu,<sup>a</sup> and Yupeng Tian<sup>\*ab</sup>

- a. Department of Chemistry, key Laboratory of Functional Inorganic Materials Chemistry of Anhui Province, Anhui University, Hefei 230039, P. R. China. E-mail: [yptian@ahu.edu.cn](mailto:yptian@ahu.edu.cn);
- b. State Key Laboratory of Coordination Chemistry, Nanjing University, Nanjing 210093, P. R. China

<sup>‡</sup> These authors contributed equally.

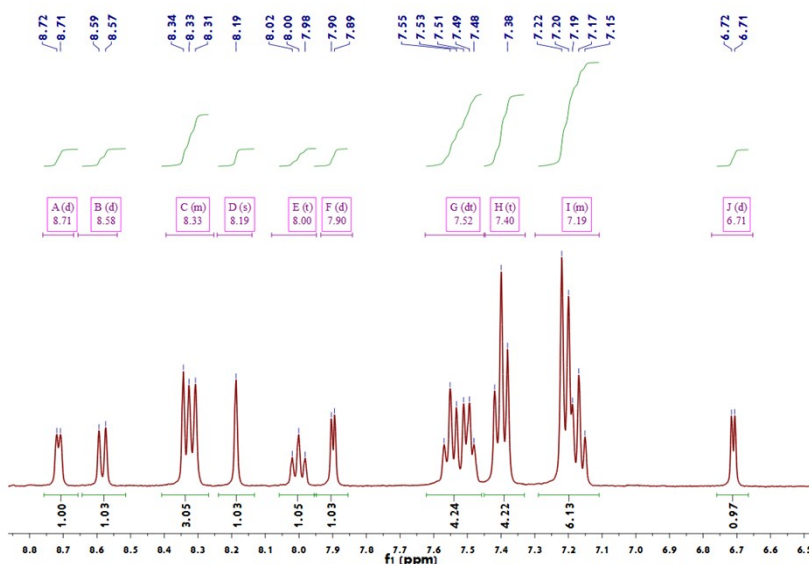

Fig. S1 <sup>1</sup>H-NMR of dye1.

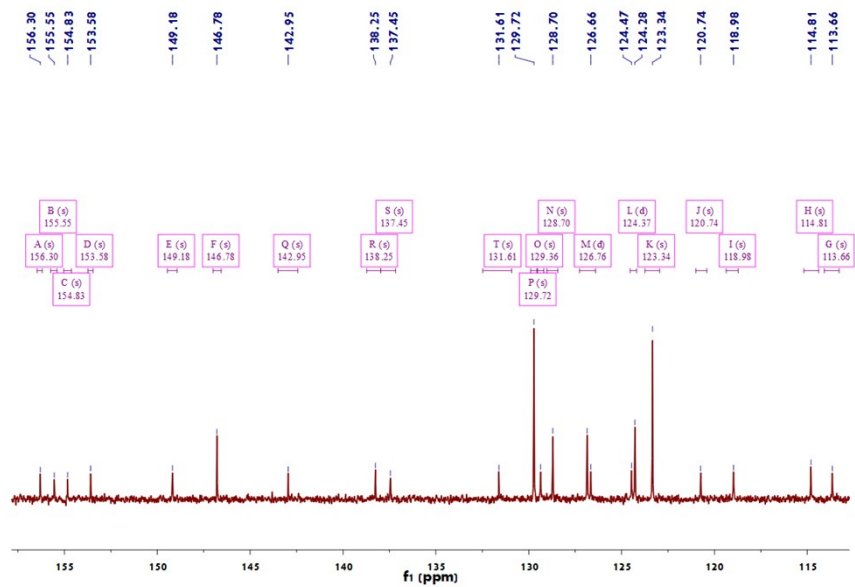

Fig. S2  $^{13}\text{C}$ -NMR of dye2.

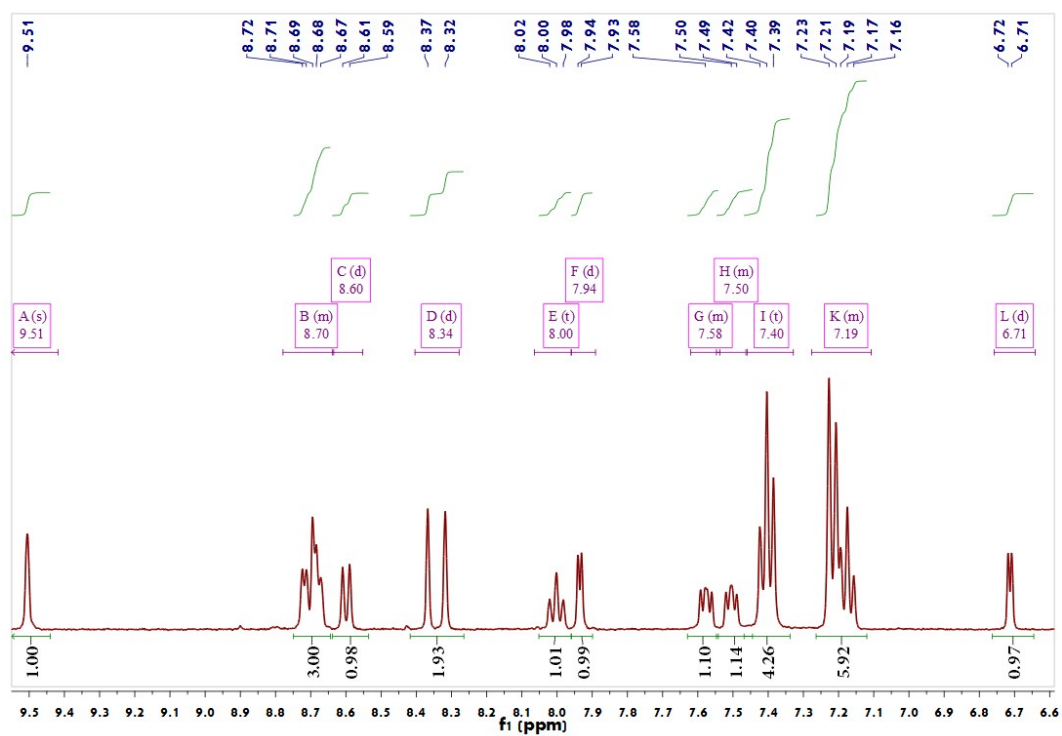

Fig. S3  $^1\text{H}$ -NMR of dye2.

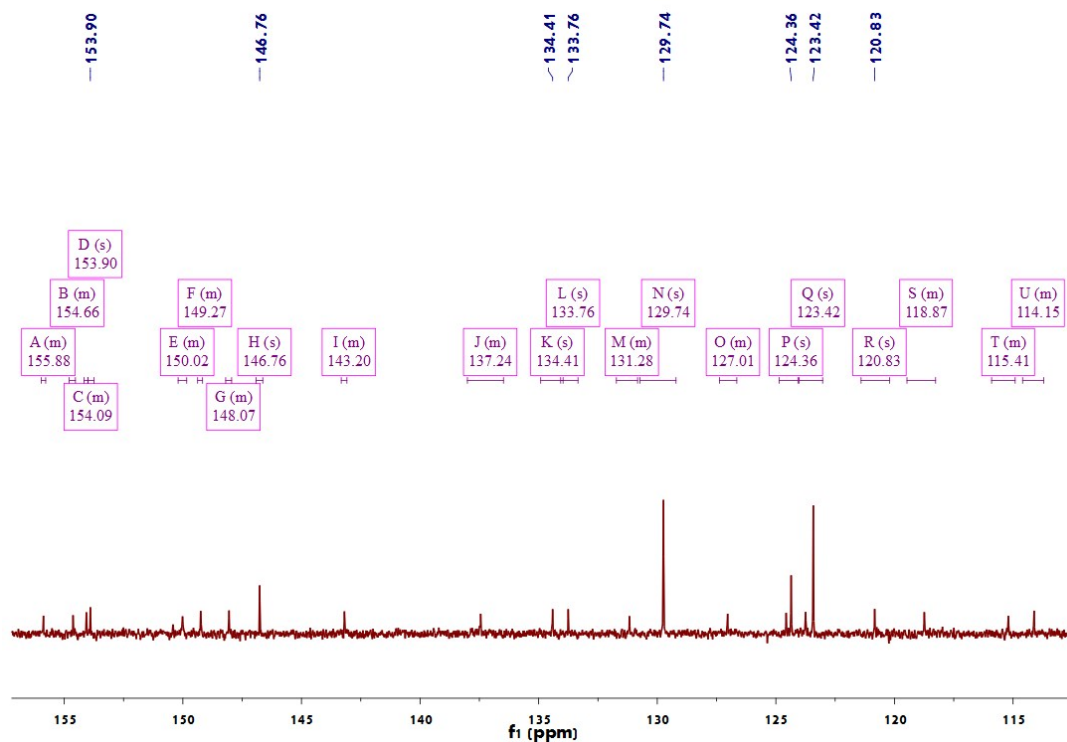

Fig. S4  $^{13}\text{C}$ -NMR of dye2.

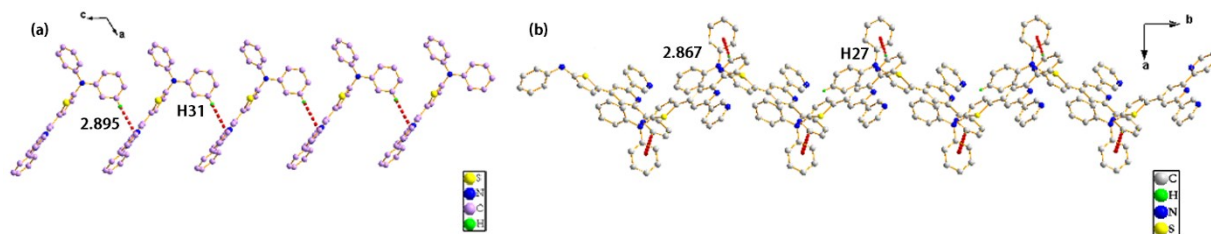

Fig. S5 The molecular packing diagrams of dye1 (left) and dye2 (right).

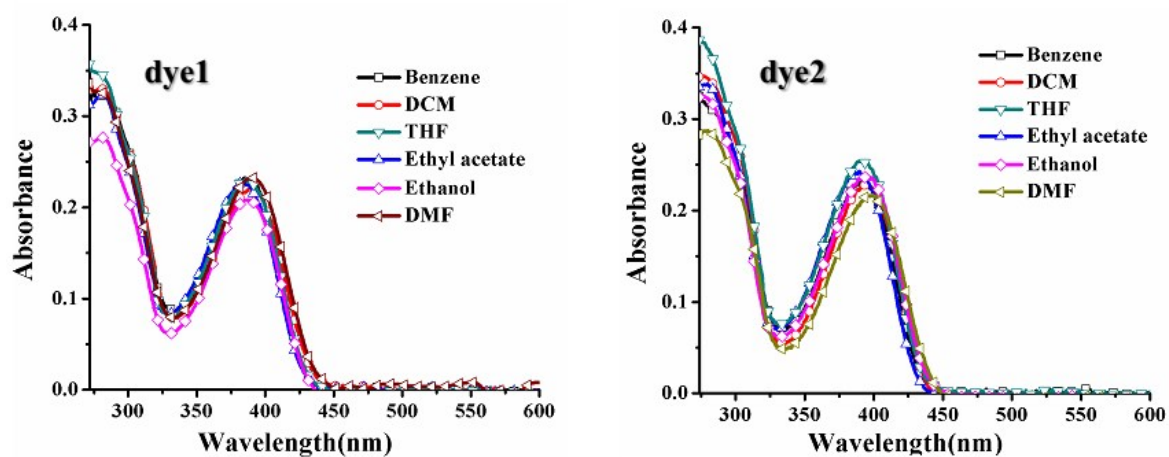

Fig. S6 Linear absorption spectra of dye1 and dye2 in six solvents with a concentration of  $1 \times 10^{-5}$  mol L<sup>-1</sup>, respectively.

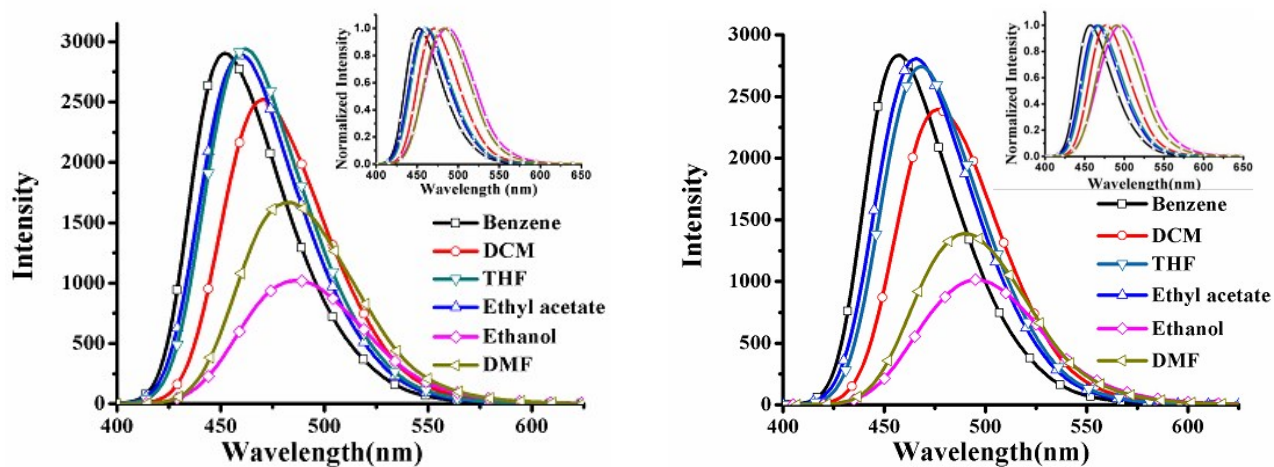

Fig. S7 Single-photon fluorescence spectra of dye1 (left) and dye2 (right) in six solvents with a concentration of  $1 \times 10^{-5}$  mol L<sup>-1</sup>, respectively.

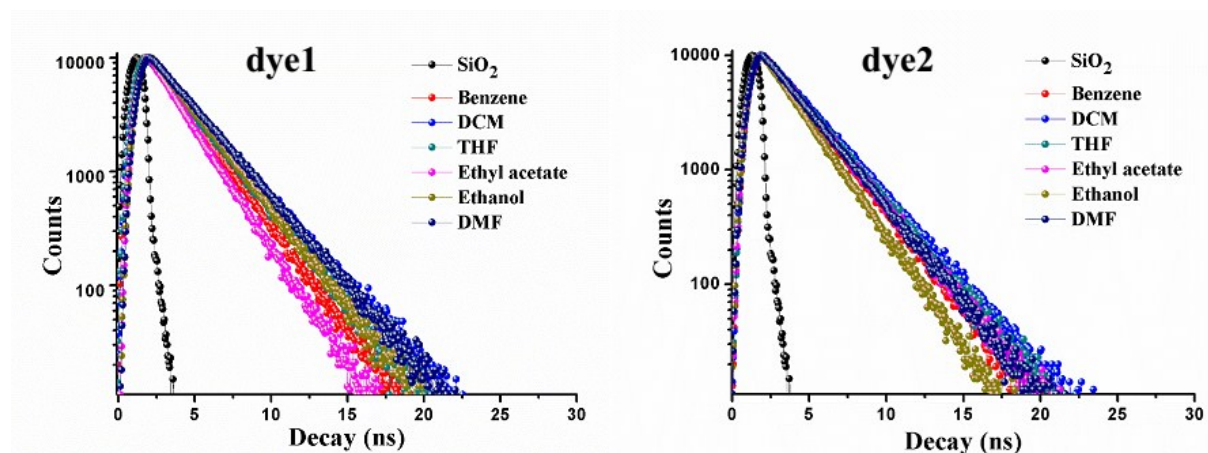

Fig. S8 Time-resolved fluorescence curves of dye1 and dye2 in six solvents, respectively.

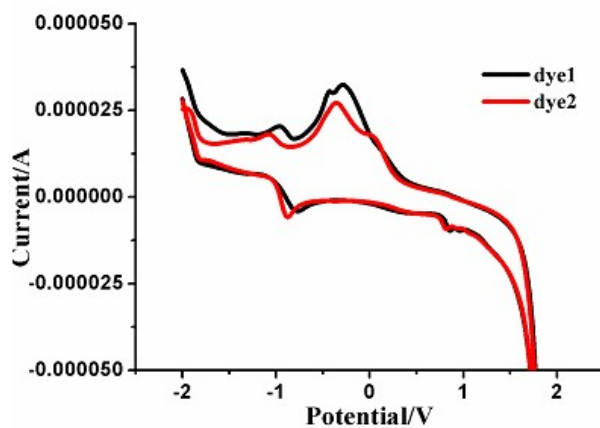

Fig. S9. Cyclic voltammetry spectrum of dye1 and dye2.

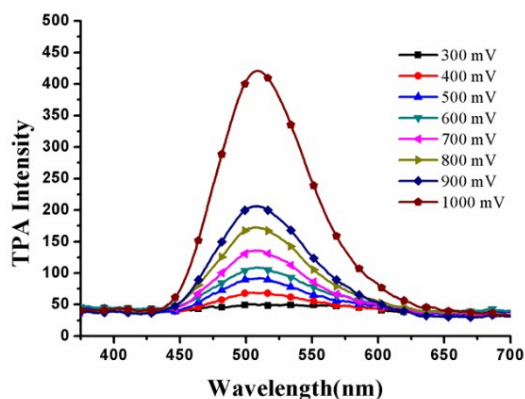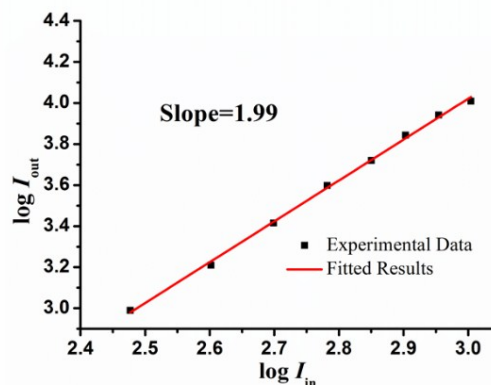

Fig. S10. TPAF spectra of **dye1** under different pumped powers at 770 nm, with  $c = 1.0 \times 10^{-3} \text{ mol L}^{-1}$  in DMF (Left); Output fluorescence ( $I_{\text{out}}$ ) vs. the square of input laser power ( $I_{\text{in}}$ ) for **dye1** (Right).

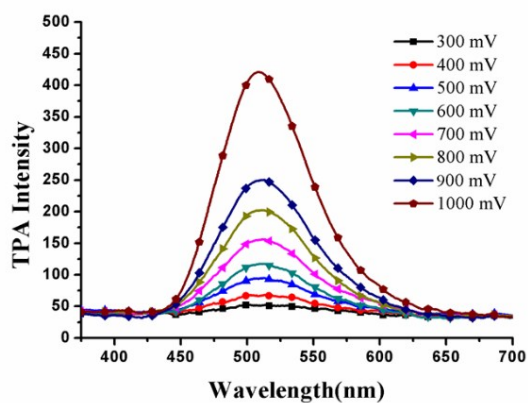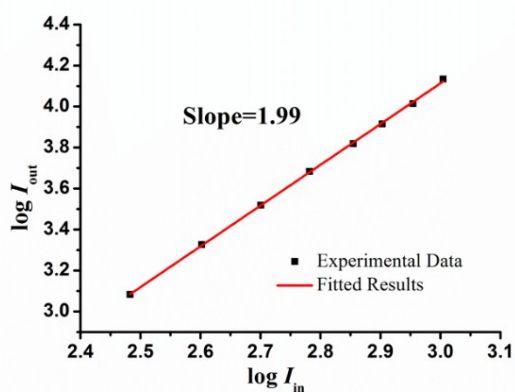

Fig. S11. TPAF spectra of **dye2** under different pumped powers at 770 nm, with  $c = 1.0 \times 10^{-3} \text{ mol L}^{-1}$  in DMF (Left); Output fluorescence ( $I_{\text{out}}$ ) vs. the square of input laser power ( $I_{\text{in}}$ ) for **dye2** (Right).

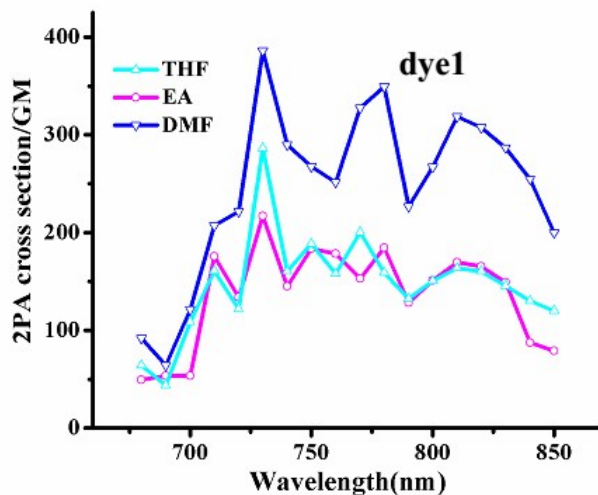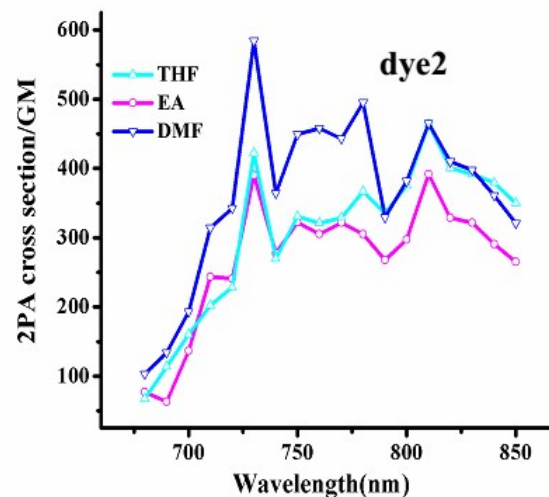



**Fig. S12.** Two-photon absorption cross-section of **dye1** and **dye2** in three solvents with concentration of  $1.0 \times 10^{-3}$  mol L<sup>-1</sup>.

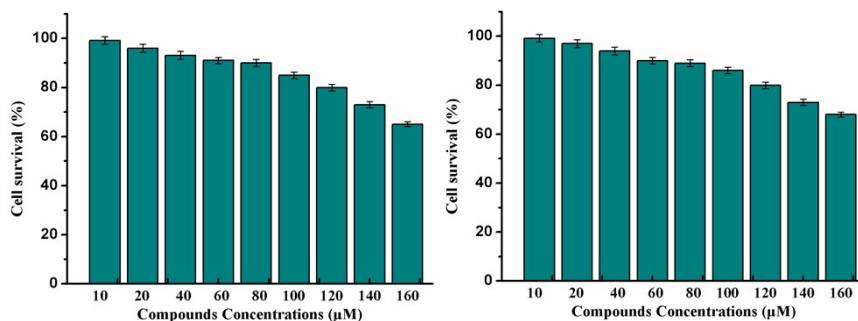

**Fig. S13.** MTT assay of HepG2 cells treated with dye1 (Left) and dye2 (Right) at different concentrations for 24 h.

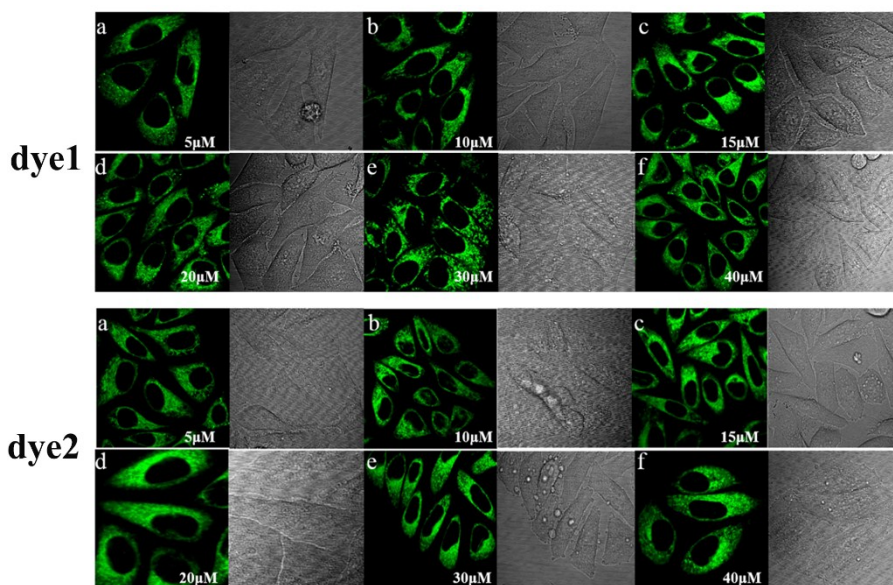

**Fig. S14.** Confocal microscopy images of HepG2 cells incubated with different concentration of **dye1** (up) and **dye2** (down) after 30min of incubation (emission wavelength from 450 nm to 550 nm).

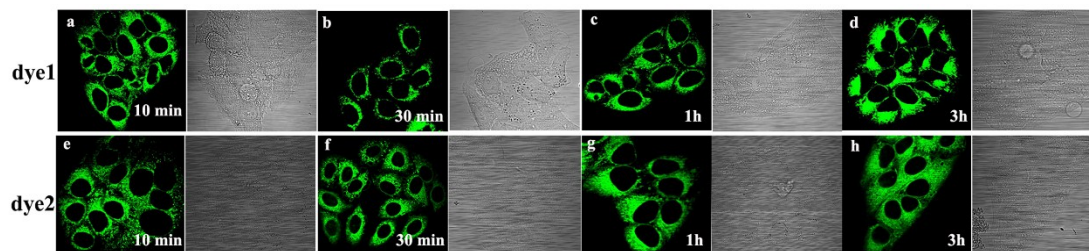

**Fig. S15.** Confocal microscopy images of HepG2 cells with 10 μM **dye1** (up) and **dye2** (down) after different incubation time (emission wavelength from 450 nm to 550 nm).

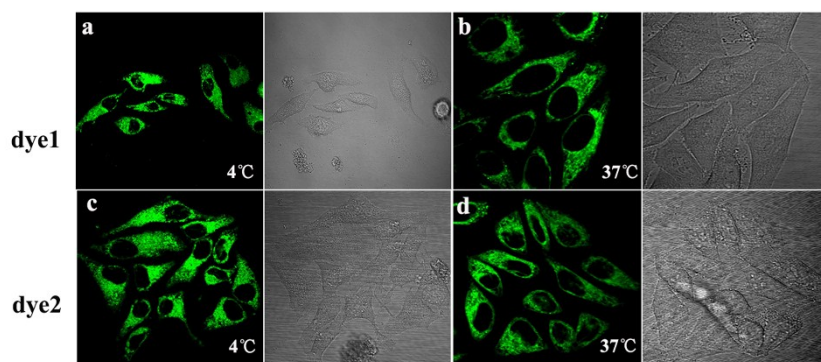

**Fig. S16.** Confocal microscopy images of HepG2 cells incubated with 10  $\mu$ M of **dye1** (up) and **dye2** (down) at 4°C and 37°C (emission wavelength from 450 nm to 550 nm).

**Table S1** Crystal data and structure refinements for **dye1** and **dye 2**.

| Compound                           | <b>dye1</b>                                                   | <b>dye2</b>                                                   |
|------------------------------------|---------------------------------------------------------------|---------------------------------------------------------------|
| Empirical formula                  | C <sub>64</sub> H <sub>44</sub> N <sub>6</sub> S <sub>2</sub> | C <sub>31</sub> H <sub>22</sub> N <sub>4</sub> S <sub>1</sub> |
| Formula weight                     | 963.19                                                        | 482.59                                                        |
| Temperature                        | 273(2) K                                                      | 273(2) K                                                      |
| Wavelength                         | 0.71069 Å                                                     | 0.71069 Å                                                     |
| Crystal system                     | P2 <sub>1</sub> /c                                            | P2 <sub>1</sub> /n                                            |
| Space group                        | Monoclinic                                                    | Monoclinic                                                    |
| a /Å                               | 15.423(5)                                                     | 9.148(6)                                                      |
| b /Å                               | 41.104(5)                                                     | 14.095(6)                                                     |
| c /Å                               | 9.126(5)                                                      | 18.970(13)                                                    |
| $\beta$ (°)                        | 120.433 (5)                                                   | 91.97 (10)                                                    |
| V/ Å <sup>3</sup>                  | 4988(3)                                                       | 2445(3)                                                       |
| Z                                  | 4                                                             | 4                                                             |
| D <sub>c</sub> /Mg m <sup>-3</sup> | 1.283                                                         | 1.311                                                         |
| $\mu$ /mm <sup>-1</sup>            | 0.160                                                         | 0.160                                                         |
| F(000)                             | 2016                                                          | 1008                                                          |
| Goodness-of-fit on F <sup>2</sup>  | 0.923                                                         | 0.958                                                         |
| Final R indices                    | R <sub>1</sub> =0.055, wR <sub>2</sub> =0.216                 | R <sub>1</sub> =0.054, wR <sub>2</sub> = 0.079                |
| CCDC                               | 912390                                                        | 1465317                                                       |

**Table S2** Selected bond distances (Å) and angles (°) for **dye1** and **dye2**.

| <b>dye1</b> |          |                  |          |
|-------------|----------|------------------|----------|
| C(21)-N(3)  | 1.429(3) | C(13)-C(6)       | 1.482(4) |
| C(27)-N(3)  | 1.415(3) | C(7)-C(12)       | 1.482(4) |
| C(20)-N(3)  | 1.411(4) | C(27)-N(1)-C(21) | 122.3(2) |
| C(17)-S(1)  | 1.722(3) | C(20)-N(1)-C(21) | 117.7(2) |
| C(19)-C(20) | 1.343(4) | C(27)-N(1)-C(20) | 119.5(3) |
| C(19)-C(18) | 1.413(4) | C(14)-C(13)-N(1) | 122.0(3) |
| C(17)-C(18) | 1.354(4) | C(7)-C(12)-N(1)  | 115.8(3) |
| C(17)-C(16) | 1.479(4) |                  |          |
| <b>dye2</b> |          |                  |          |
| C(1)-N(1)   | 1.429(3) | C(17)-C(23)      | 1.489(4) |
| C(13)-N(1)  | 1.408(3) | C(21)-C(31)      | 1.490(4) |
| C(7)-N(1)   | 1.419(4) | C(13)-N(1)-C(7)  | 119.0(3) |
| C(13)-S(1)  | 1.734(1) | C(13)-N(1)-C(1)  | 119.1(3) |
| C(13)-C(14) | 1.346(4) | C(1)-N(1)-C(7)   | 121.6(3) |
| C(14)-C(15) | 1.415(3) | C(23)-C(17)-N(2) | 115.3(3) |
| C(15)-C(16) | 1.354(4) | C(21)-C(31)-N(3) | 117.4(3) |
| C(1)-C(19)  | 1.463(4) |                  |          |
